# Supplementary material
Source: PubMed Central journal article supplement (PMC3582286)
Supplement: cn300177g_si_001.pdf [file cn300177g_si_001.pdf]

*Supporting Information*

TM3

```
GluCIR $\alpha$  VWIGACMTFIFCALLEFALVNHIA  
GlyR $\alpha$ 1 IWMAVCLLFVFSALLEYAAVNFVS  
GlyR $\alpha$ 3 IWMAVCLLFVFSALLEYAAVNFVS  
:*:.:*:*:*:*:*:*:*:*:
```

TM4

```
GluCIR $\alpha$  KRVDLISRALFPVLFFVFNILYWSRF  
GlyR $\alpha$ 1 KKIDKISRIGFPMAFLIFNMFYWIIY  
GlyR $\alpha$ 3 KKIDTISRACFPLAFLIFNIFYWVIY  
*:.:* *** *: *:.:*:*:*:*:
```

**Figure S1.** Amino acid sequence alignment of the TM3 and TM4 domains of the human  $\alpha$ 1 GlyR, the human  $\alpha$ 3 GlyR and the *C. elegans*  $\alpha$  GluCIR that were used to generate the structural models of  $\alpha$ 1 GlyR and  $\alpha$ 3 GlyR from the *C. elegans*  $\alpha$  GluCIR crystal structure (PDB code: 3RIF).

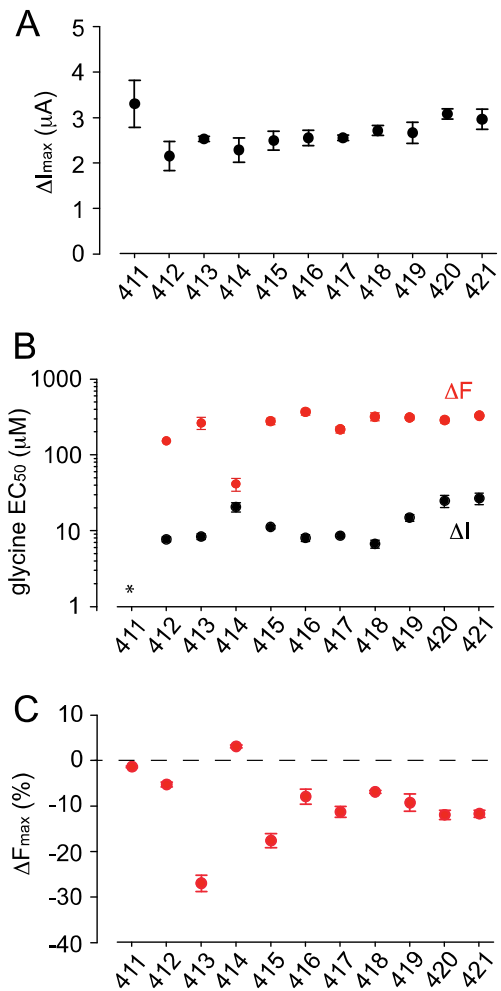

**Figure S2.** Functional comparison of MTS-TAMRA-labeled  $\alpha 1$  GlyRs. A. Mean  $\Delta I_{\max}$  values for all labeled  $\alpha 1$  GlyRs investigated here reveals no significant variation using ANOVA and post-hoc tests as described in the text. B. Mean  $\Delta I$  EC<sub>50</sub> and  $\Delta F$  EC<sub>50</sub> values (shown in black and red, respectively) differed by around an order of magnitude at all labeled sites except for R414C. C. Mean  $\Delta F_{\max}$  values were negative at all labeled sites except for R414C.
